# Supplementary material for: Morphology engineering of protein fabrics for advanced and sustainable filtration
Source: Royal Society of Chemistry journal article supplement (doi:10.1039/c8ta08717b), 2018-01-01
Supplement: c8ta08717b1.pdf [file c8ta08717b1.pdf]

Electronic Supplementary Material (ESI) for Journal of Materials Chemistry A.  
This journal is © The Royal Society of Chemistry 2018

## Electronic Supplementary Information

### Morphology Engineering of Protein Fabrics for Advanced and Sustainable Filtration

Xin Fan<sup>a,b,c</sup>, Yu Wang<sup>\*b</sup>, Min Zheng<sup>b</sup>, Francis Dunne<sup>b</sup>, Tian Liu<sup>b</sup>, Xuewei Fu<sup>b</sup>, Lushi  
Kong<sup>d</sup>, Siyi Pan<sup>\*a,c</sup> and Wei-Hong Zhong<sup>\*b</sup>

<sup>a</sup> College of Food Science and Technology, Huazhong Agricultural University, No. 1  
Shizishan Road, Wuhan, Hubei, 430070, PR China

<sup>b</sup> School of Mechanical and Materials Engineering, Washington State University, 100  
Dairy Road, Pullman, WA, 99164, USA

<sup>c</sup> Key Laboratory of Environment Correlative Dietology (Huazhong Agricultural  
University), Ministry of Education, No. 1 Shizishan Road, Wuhan, Hubei, 430070, PR  
China

<sup>d</sup> College of Materials Science and Engineering, Beijing University of Chemical  
Technology, North Third Ring Road, Beijing, 100029, PR China

Corresponding Authors:

Yu Wang ([yu.wang3@wsu.edu](mailto:yu.wang3@wsu.edu))

Siyi Pan ([pansiyi@mail.hzau.edu.cn](mailto:pansiyi@mail.hzau.edu.cn))

Wei-Hong Zhong ([katie\\_zhong@wsu.edu](mailto:katie_zhong@wsu.edu))

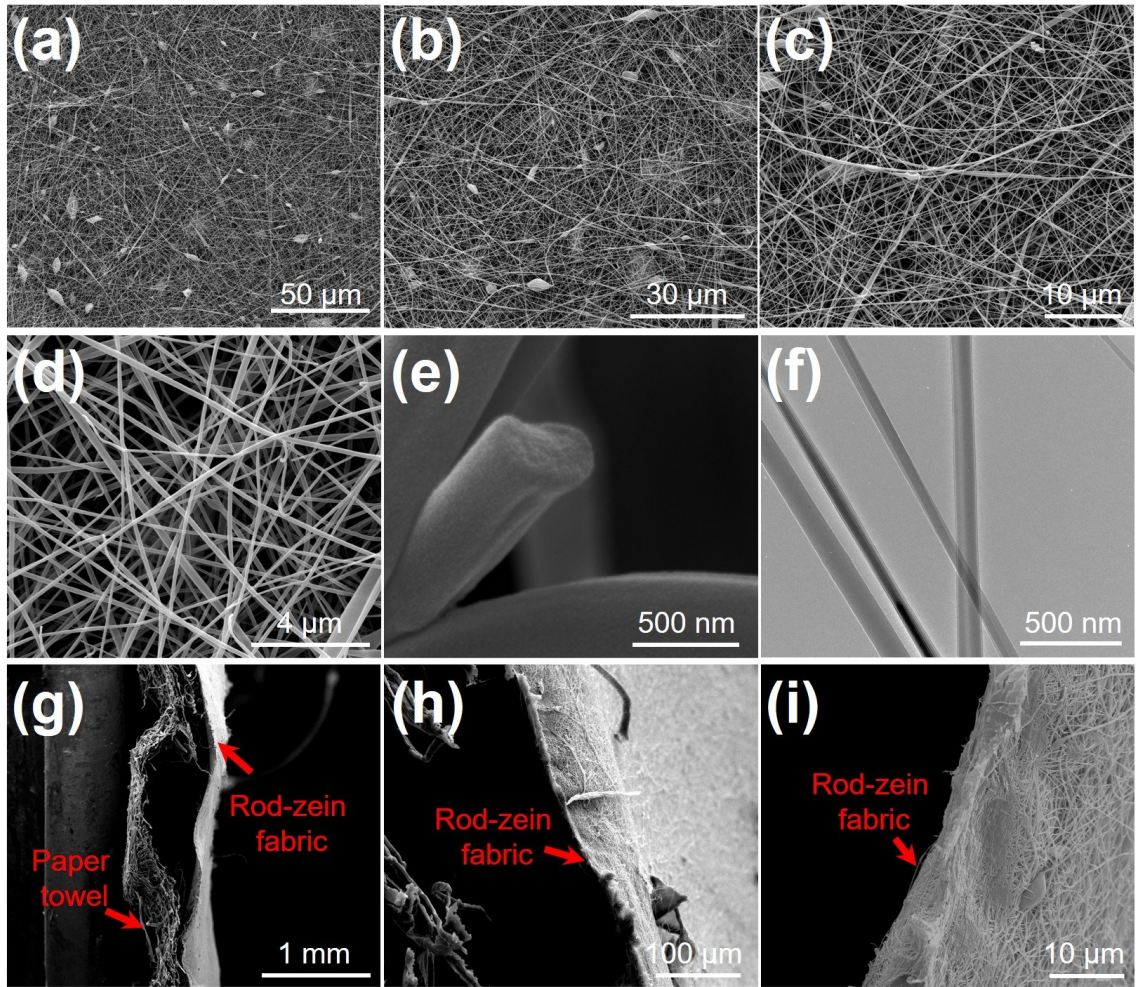

**Fig. S1.** (a-e) and (g-i) SEM and (f) TEM images of the rod-zein fibres by electrospinning of the stable zein solution in AA/DI.

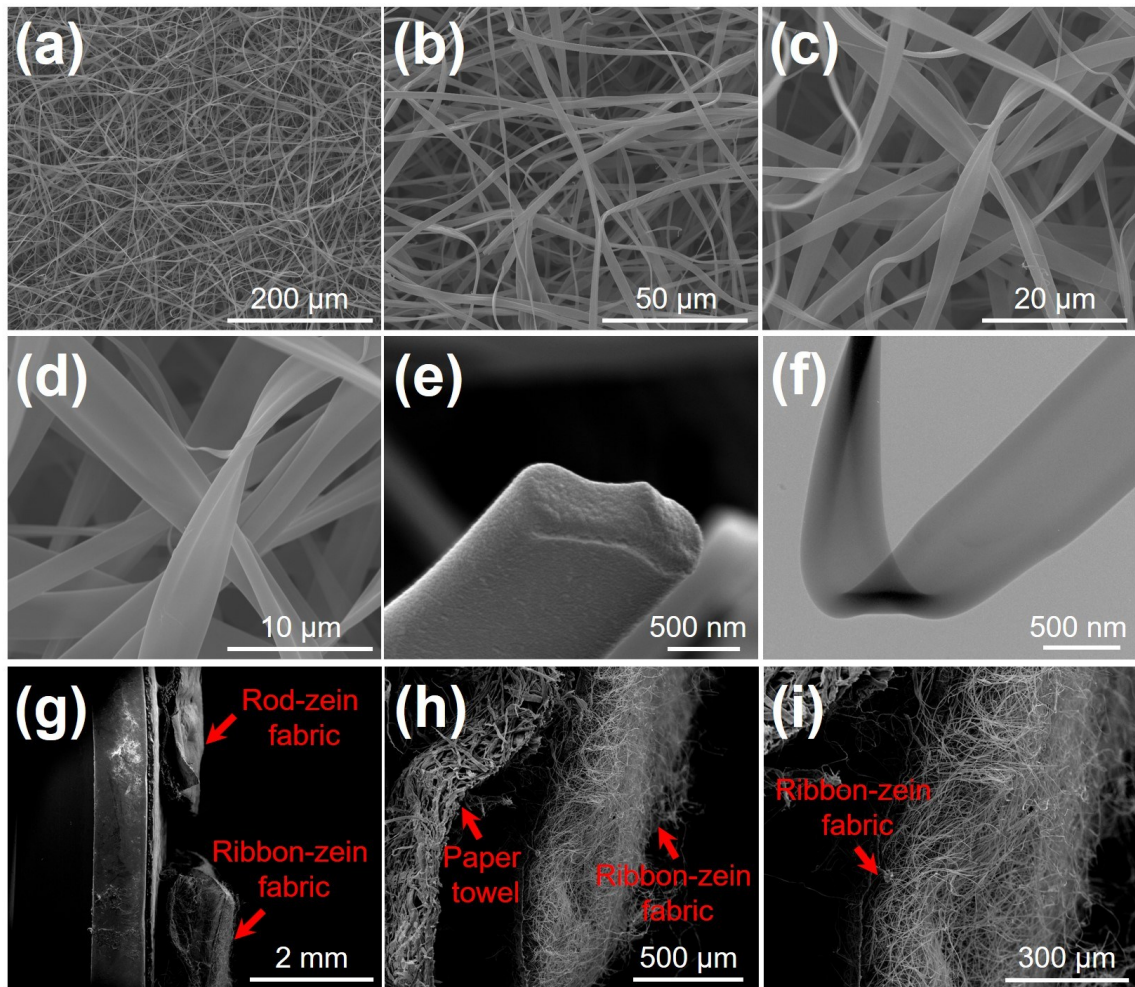

**Fig. S2.** (a-e) and (g-i) SEM and (f) TEM images of the self-curved ribbon-zein fibre by electrospinning of the metastable zein solution in acetone/butanol/DI.

**Table S1.** The porosity, normalized pressure drop and quality factor of rod- and ribbon-zein air-filter.

|                                    | Ribbon-Zein<br>air-filter | Rod-Zein<br>air-filter |
|------------------------------------|---------------------------|------------------------|
| Porosity (%)                       | 82.45                     | 32.53                  |
| Normalized pressure drop (kPa/g)   | 4.148                     | 53.997                 |
| Quality factor (Pa <sup>-1</sup> ) | 0.075                     | 0.004                  |

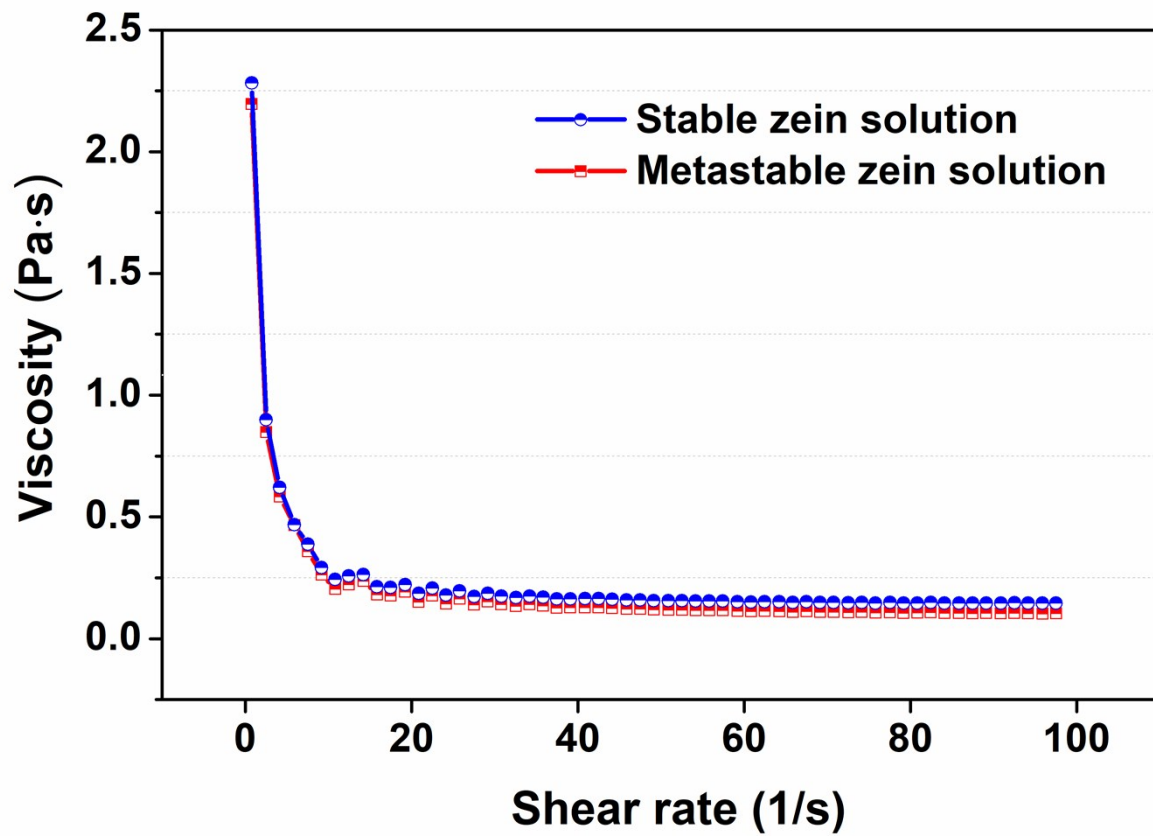

**Fig. S3.** Viscosity vs. shear rate for the stable and metastable zein solutions.

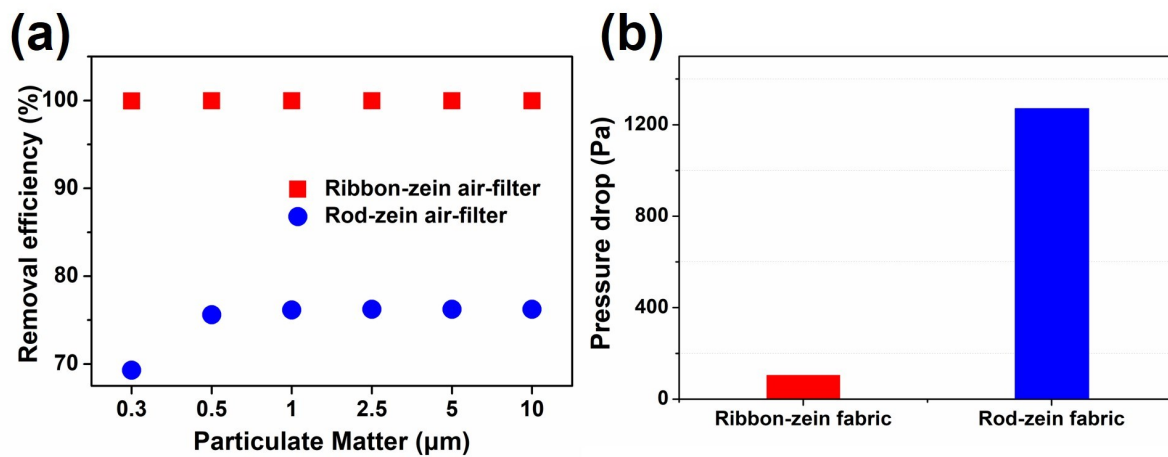

**Fig. S4.** (a) The PM removal efficiencies for the ribbon- and rod-zein air-filter at the same pressure drop (ca. 110 Pa); (b) The pressure drop of ribbon- and rod-zein air-filter at the same level efficiency for PM<sub>0.3</sub> (ca. 99.9%).

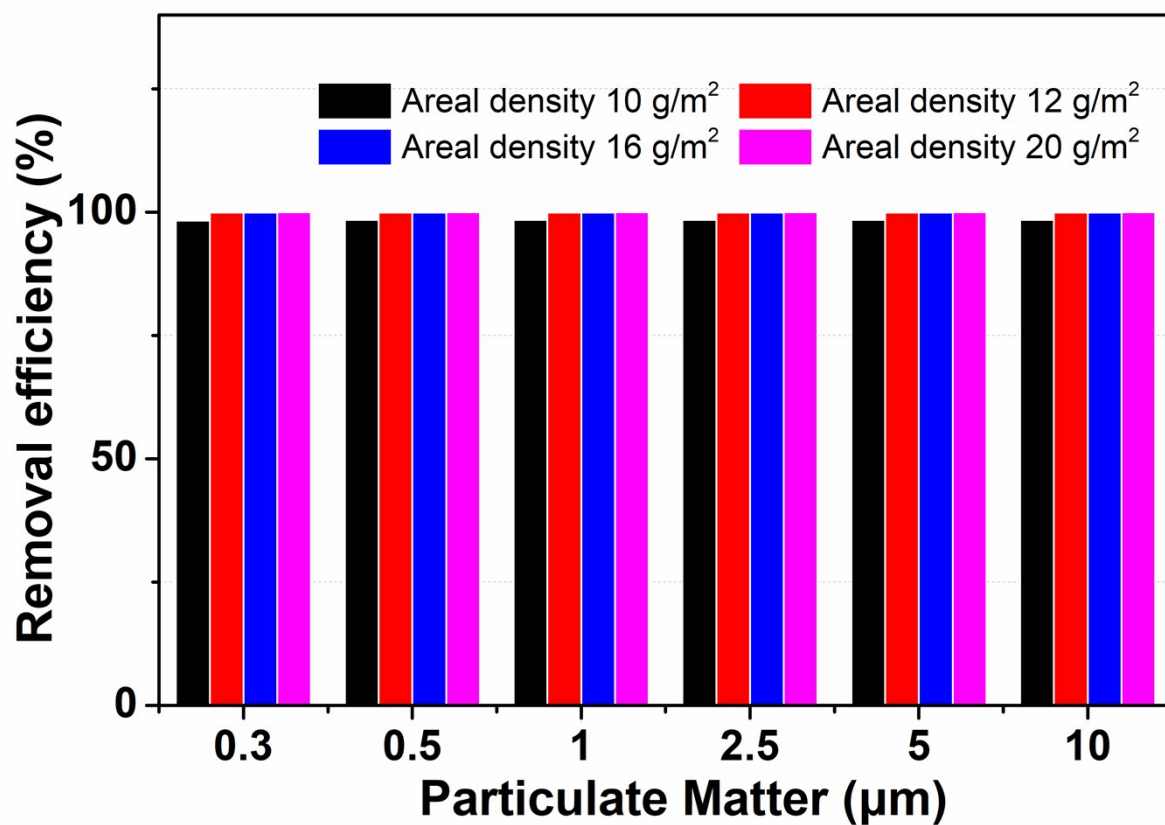

**Fig. S5.** The PM removal efficiencies for the ribbon-zein air-filter with different areal density: 10, 12, 16 and 20 g/m<sup>2</sup>.

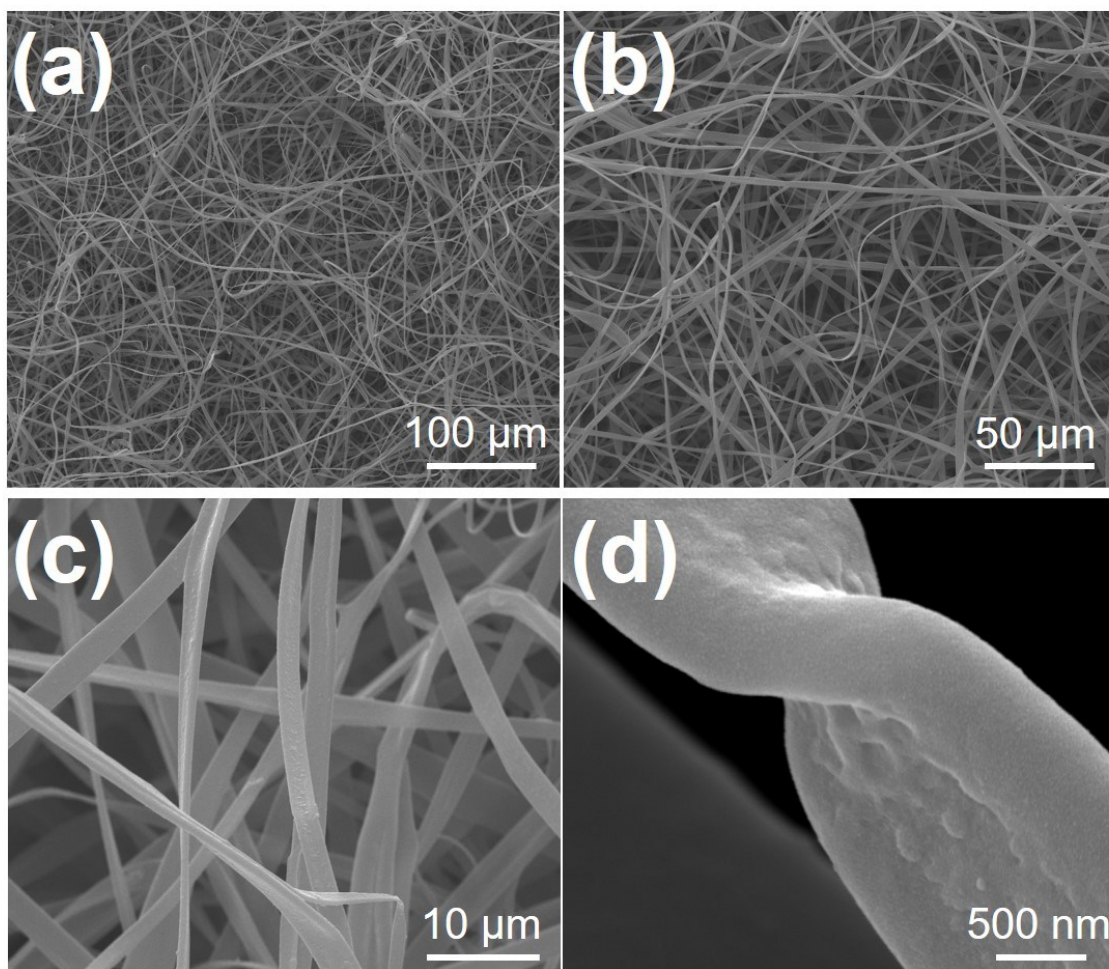

**Fig. S6.** (a-d) SEM images of ribbon-zein air-filter after filtration.



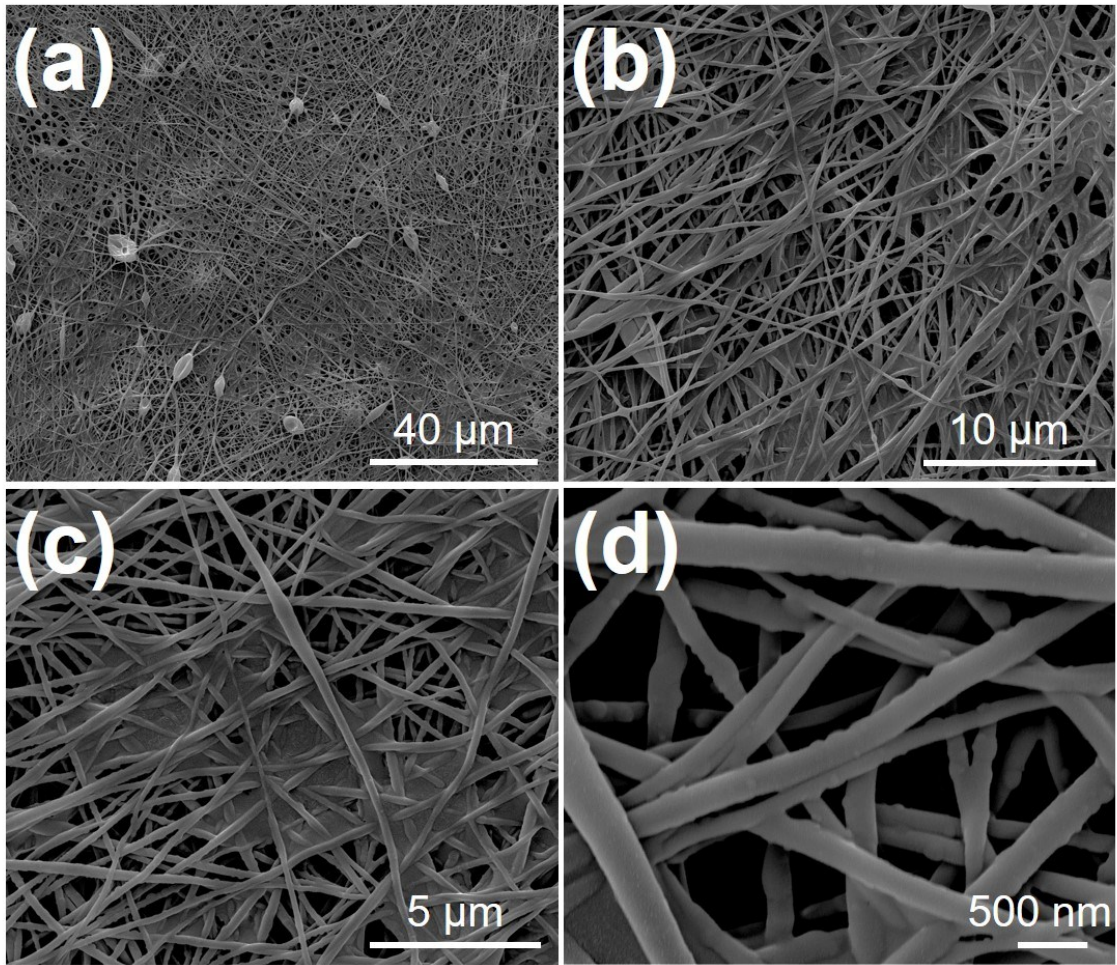

**Fig. S7.** (a-d) SEM images of rod-zein air-filter after filtration.

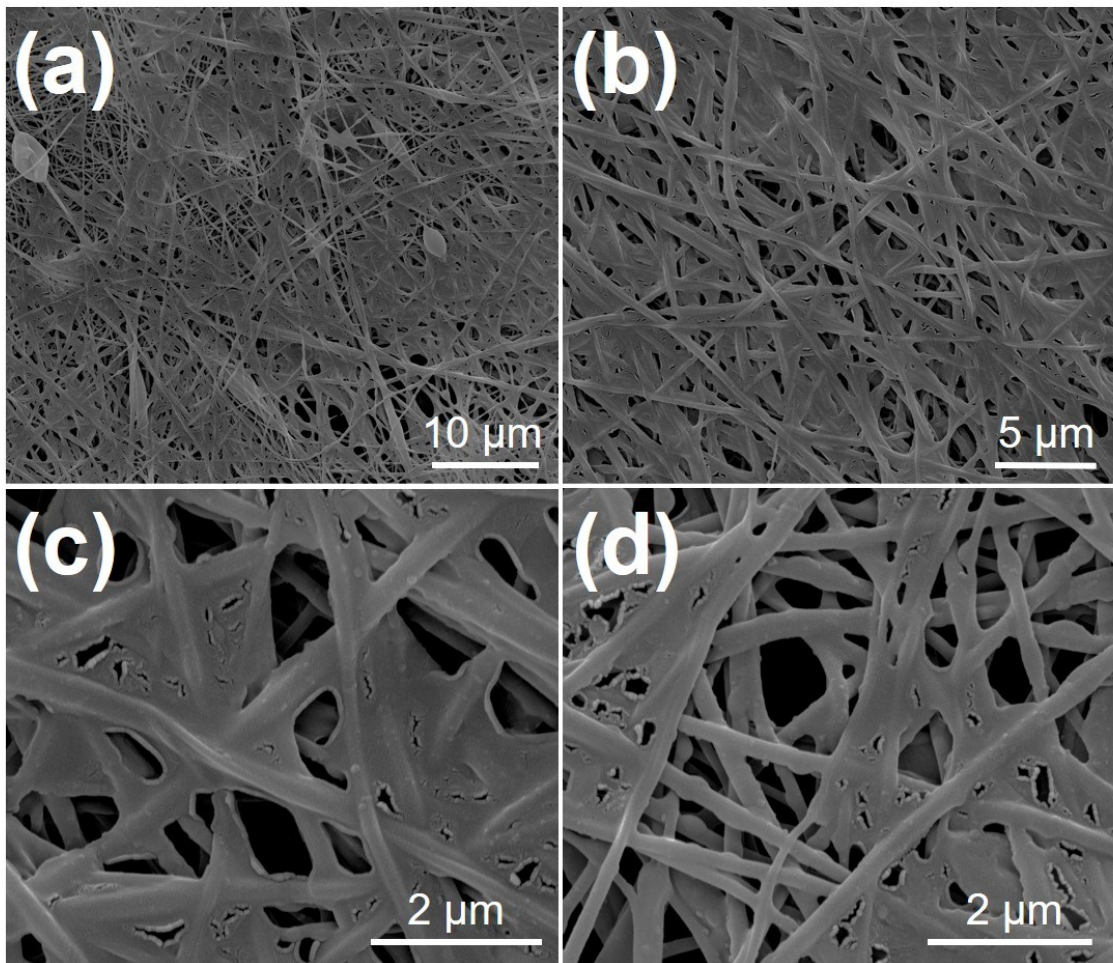

**Fig. S8.** (a-d) SEM images of commercial air-filter after filtration.
